# Supplementary material for: The Healthcare Experience of Autistic Patients in Orthopaedic Surgery and Closely Related Fields: A Scoping Review
Source: MDPI journal article supplement (doi:10.3390/children10050906), 2023-05-22
Supplement: s1 [file s1]

## **Supplement S1. Literature search query formula.**

*Last updated: March 3, 2023*

*Total: 122*

*Total to screen after deduplication: 114*

### **Concept 1: Patients with Autism Spectrum Disorder**

#### **PubMed MeSH**

"Autism Spectrum Disorder"[Mesh] OR ("Child Development Disorders, Pervasive"[Mesh:NoExp] AND 2010[pdat]:2015[pdat])

#### **CINAHL**

(MH "Autistic Disorder") OR (MH "Asperger Syndrome")

#### **Embase**

'autism'/exp

#### ***Keywords:***

autistic OR autism OR asperger OR asperger's

### **Concept 2: Patient Experience**

#### **PubMed MeSH**

("Treatment Adherence and Compliance"[Mesh]) AND ("Patient Compliance"[Mesh:NoExp] AND 1971[pdat]:2017[pdat])

#### **CINAHL**

(MH "Patient Compliance") OR (MH "Patient Satisfaction")

#### **Embase**

'patient attitude'/exp

***Keywords:***

patient experience\* OR patient satisfaction OR patient compliance OR patient adherence OR  
patient preference\*

(therapy OR treatment OR patient) NEAR/2 (satisfaction OR experience OR compliance OR  
adherence OR preference)

**Concept 3: Movement Science**

PubMed MeSH

((((( "Physical and Rehabilitation Medicine"[Mesh]) OR ( "Physical Therapy Specialty"[Mesh]  
OR "Physical Therapy Modalities"[Mesh] )) OR "Occupational Therapists"[Mesh]) OR  
"Orthopedic Surgeons"[Mesh]) OR "Orthopedics"[Mesh]) OR "Orthopedic Procedures"[Mesh]  
OR "Gait"[Mesh]

CINAHL

(MH "Orthopedic Surgery") OR (MH "Orthopedics") OR (MH "Occupational Therapy") OR  
(MH "Physical Therapy") OR (MH "Gait")

Embase

'orthopedic surgery'/exp OR 'orthopedics'/exp OR 'physiotherapy'/exp OR 'occupational  
therapy'/exp OR 'rehabilitation medicine'/exp OR 'gait'/exp

***Keywords:***

"toe walking" OR "postural instability" OR gait OR "walking pattern" OR posture OR motor OR  
orthopedic\* OR "occupational therap\*" OR "physical therap\*" OR "physical rehab\*" OR

"rehabilitation medicine" OR "rehabilitation science" OR physiatry OR orthopaedic\* OR  
 physiotherapy OR ergotherap\* OR "physical medicine"  
 'toe walking' OR 'postural instability' OR gait OR 'walking pattern' OR posture OR motor OR  
 orthopedic\* OR 'occupational therap\*' OR 'physical therap\*' OR 'physical rehab\*' OR  
 'rehabilitation medicine' OR 'rehabilitation science' OR physiatry OR orthopaedic\* OR  
 physiotherapy OR ergotherap\* OR 'physical medicine'  
 motor NEAR/2 (development OR delay OR difference OR abnormal\*)

### **Queries:**

#### **PubMed**

1 ("Autism Spectrum Disorder"[Mesh] OR ("Child Development Disorders,  
 Pervasive"[Mesh:NoExp] AND 2010[pdat]:2015[pdat])) OR (autistic[Title/Abstract] OR  
 autism[Title/Abstract] OR asperger[Title/Abstract] OR asperger's[Title/Abstract])  
 2 (("Treatment Adherence and Compliance"[Mesh]) AND ("Patient Compliance"[Mesh:NoExp]  
 AND 1971[pdat]:2017[pdat])) OR (patient experience\*[Title/Abstract] OR patient  
 satisfaction[Title/Abstract] OR patient compliance[Title/Abstract] OR patient  
 adherence[Title/Abstract] OR patient preference\*[Title/Abstract])  
 3 ((((((("Physical and Rehabilitation Medicine"[Mesh]) OR ( "Physical Therapy  
 Specialty"[Mesh] OR "Physical Therapy Modalities"[Mesh] )) OR "Occupational  
 Therapists"[Mesh]) OR "Orthopedic Surgeons"[Mesh]) OR "Orthopedics"[Mesh]) OR  
 "Orthopedic Procedures"[Mesh] OR "Gait"[Mesh]) OR ("toe walking"[Title/Abstract] OR  
 "postural instability"[Title/Abstract] OR gait[Title/Abstract] OR walking pattern[Title/Abstract]  
 OR posture[Title/Abstract] OR motor[Title/Abstract] OR orthopedic\*[Title/Abstract] OR  
 occupational therap\*[Title/Abstract] OR physical therap\*[Title/Abstract] OR physical

rehab\*[Title/Abstract] OR rehabilitation medicine[Title/Abstract] OR rehabilitation  
science[Title/Abstract] OR physiatry[Title/Abstract] OR orthopaedic\*[Title/Abstract] OR  
physiotherapy[Title/Abstract] OR ergotherap\*[Title/Abstract] OR physical  
medicine[Title/Abstract])

4 1 AND 2 AND 3

5 results

## **Embase**

1 'autism'/exp

2 autistic:ti,ab,kw OR autism:ti,ab,kw OR asperger:ti,ab,kw OR aspergers:ti,ab,kw

3 1 OR 2

4 'patient attitude'/exp

5 ((therapy OR treatment OR patient) NEAR/2 (satisfaction OR experience OR compliance OR  
adherence OR preference)):ti,ab,kw

6 4 OR 5

7 'orthopedic surgery'/exp OR 'orthopedics'/exp OR 'physiotherapy'/exp OR 'occupational  
therapy'/exp OR 'rehabilitation medicine'/exp OR 'gait'/exp

8 (motor NEAR/2 (development OR delay OR difference OR abnormal\*)):ti,ab,kw

9 'toe walking':ti,ab,kw OR 'postural instability':ti,ab,kw OR gait:ti,ab,kw OR 'walking

pattern':ti,ab,kw OR posture:ti,ab,kw OR motor:ti,ab,kw OR orthopedic\*:ti,ab,kw OR

'occupational therap\*':ti,ab,kw OR 'physical therap\*':ti,ab,kw OR 'physical rehab\*':ti,ab,kw OR

'rehabilitation medicine':ti,ab,kw OR 'rehabilitation science':ti,ab,kw OR physiatry:ti,ab,kw OR

orthopaedic\*:ti,ab,kw OR physiotherapy:ti,ab,kw OR ergotherap\*:ti,ab,kw OR 'physical

medicine':ti,ab,kw

10 7 OR 8 OR 9

11 10 AND [embase]/lim

## **CINAHL**

1 (MH "Autistic Disorder") OR (MH "Asperger Syndrome")

2 TI (autistic OR autism OR asperger OR asperger's ) OR AB ( autistic OR autism OR asperger OR asperger's )

3 1 OR 2

4 (MH "Patient Compliance") OR (MH "Patient Satisfaction")

5 TI ( (therapy OR treatment OR patient) N2 (satisfaction OR experience\* OR compliance OR adherence OR preference\*) ) OR AB ( (therapy OR treatment OR patient) N2 (satisfaction OR experience\* OR compliance OR adherence OR preference\*) )

6 4 OR 5

7 (MH "Orthopedic Surgery") OR (MH "Orthopedics") OR (MH "Occupational Therapy") OR (MH "Physical Therapy") OR (MH "Gait")

8 TI (motor N2 (development\* OR delay& OR difference\* OR abnormal\*) ) OR AB ( motor N2 (development\* OR delay& OR difference\* OR abnormal\*) )

9 TI ( "toe walking" OR "postural instability" OR gait OR "walking pattern" OR posture OR motor OR orthopedic\* OR "occupational therap\*" OR "physical therap\*" OR "physical rehab\*" OR "rehabilitation medicine" OR "rehabilitation science" OR physiatry OR orthopaedic\* OR physiotherapy OR ergotherap\* OR "physical medicine" ) OR AB ( "toe walking" OR "postural

instability" OR gait OR "walking pattern" OR posture OR motor OR orthopedic\* OR  
"occupational therap\*" OR "physical therap\*" OR "physical rehab\*" OR "rehabilitation  
medicine" OR "rehabilitation science" OR physiatry OR orthopaedic\* OR physiotherapy OR  
ergotherap\* OR "physical medicine" )

10 7 OR 8 OR 9

11 3 AND 6 AND 10

14
